# Supplementary material for: Small polymorphisms are a source of ancestral bias in structural variant breakpoint placement
Source: HighWire-hosted journal article supplement (doi:10.1101/gr.278203.123), 2024-01-01
Supplement: Supplemental_Tables.xlsx [file Supplemental_Tables.xlsx]

## Sheet: S1
Supplemental Table 1. Offsets per haplotype pair. Average breakpoint differences per of haplotype (n = 2,016 combinations of 64 haplotypes). No TR/SD: SV is not anchored in TRs or SDs. SD no TR: SV is anchored in SDs but not TRs. All: All variants including those TRs and SDs. N: Average number of variants. Diff: Average number of variants with different breakpoints. Diff %: Average percentage of …
		Insertions				Deletions
		N	Diff	Diff %		N	Diff	Diff %
No TR/SD		1235	54	0.044		391	7	0.017
SD no TR		58	6	0.098		22	2	0.088
All		4862	967	0.2		2614	382	0.147

## Sheet: S2
Supplemental Table 2. Breakpoint offset by caller. Breakpoint differences across samples was measured on three read-alignment based callers (pbsv, Sniffles, and SVIM) and three assembly-alignment callers (PAV, DipCall and SVIM-asm). No TR/SD: SV is not anchored in TRs or SDs. SD no TR: SV is anchored in SDs but not TRs. N: Number of variants. Diff: Number of variants with different breakpoints ac…
			Insertions				Deletions
	Caller		N	Diff	Diff %		N	Diff	Diff %
No TR/SD
	PAV		14961	882	0.0589533		5804	180	0.0310131
	DipCall		12993	382	0.0294004		5495	142	0.0258417
	SVIM-asm		13165	849	0.0644892		5561	158	0.0284122
	pbsv		12111	2709	0.223681		5532	800	0.144613
	Sniffles		12260	4449	0.362887		5526	1566	0.283388
	SVIM		11195	1675	0.14962		5541	2879	0.519581
SD no TR
	PAV		2609	440	0.168647		1922	402	0.209157
	DipCall		1485	215	0.144781		1004	153	0.15239
	SVIM-asm		1812	467	0.257726		1314	270	0.205479
	pbsv		678	189	0.278761		394	66	0.167513
	Sniffles		710	312	0.439437		378	150	0.396825
	SVIM		630	149	0.236508		385	250	0.649351

## Sheet: S3
Supplemental Table 3. Consequences of breakpoint placement on RefSeq genes. Regions between SV breakpoint locations between minimap2 and graph methods intersect RefSeq gene features. Small variants and alignment anomolies are often observed in the regions between the breakpoint locations potentially affecting genes. The number of SV affecting each feature is shown. CDS: Coding sequence. UTR: Untr…
Graph	SV Type	Sample	CDS	5′ UTR	3′ UTR	ncRNA
MC	Insertions	HG03486	22	155	21	212
MC	Insertions	HG02818	19	168	15	182
MC	Deletions	HG03486	4	85	4	108
MC	Deletions	HG02818	6	78	4	113
PGGB	Insertions	HG03486	12	53	8	74
PGGB	Insertions	HG02818	12	55	7	69
PGGB	Deletions	HG03486	3	41	2	47
PGGB	Deletions	HG02818	2	34	1	36

## Sheet: S4
Supplemental Table 4. Key resources. Key resources used for this study.
Resource	Source	Identifier / version
Merged Ebert callset	https://ftp.1000genomes.ebi.ac.uk/vol1/ftp/data_collections/HGSVC2/release/v2.0/integrated_callset/	v2.0 (Freeze4)
Python		3.9.15
NumPy		1.22.4
SciPy		1.9.3
BEDTools		2.30.0
BLAST		2.13.0
swalign	Python package	0.3.7
HPRC PGGB decomposed VCF	https://s3-us-west-2.amazonaws.com/human-pangenomics/pangenomes/freeze/freeze1/pggb/vcfs/hprc-v1.0-pggb.grch38.vcfbub.a100k.wave.vcf.gz	1.0
HPRC MC decomposed VCF	https://s3-us-west-2.amazonaws.com/human-pangenomics/pangenomes/freeze/freeze1/minigraph-cactus/hprc-v1.0-mc.grch38.vcfbub.a100k.wave.vcf.gz	1.0
HPRC MC decomposed VCF	https://s3-us-west-2.amazonaws.com/human-pangenomics/pangenomes/freeze/freeze1/minigraph-cactus/hprc-v1.1-mc-grch38/hprc-v1.1-mc-grch38.vcfbub.a100k.wave.vcf.gz	1.1
RAxML-NG		1.2.0
ETE3	Python package	3.1.2
pbsv		2.9.0
Sniffles		2.0.7
SVIM		2.0.0
DipCall		0.3
SVIM-asm		1.0.3
